# Supplementary material for: Rapid Quantification of Mutant Fitness in Diverse Bacteria by Sequencing Randomly Bar-Coded Transposons
Source: PubMed Central journal article supplement — mBio. 2015 May 12;6(3):e00306-15. doi: 10.1128/mBio.00306-15 (PMC4436071; doi:10.1128/mbio.00306-15), 2015-05-12
Supplement: mbo002152313sf4.pdf [file mbo002152313sf4.pdf]

**A. 'Naive' Fitness From Total Counts**

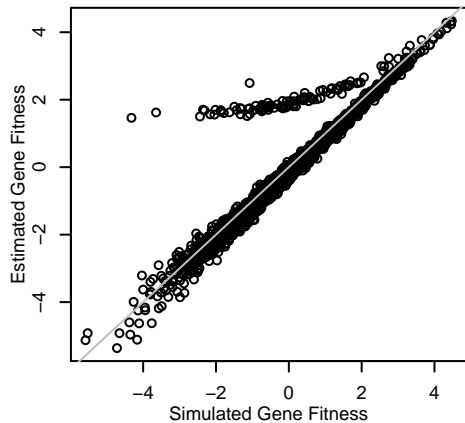

**B. Our Approach**

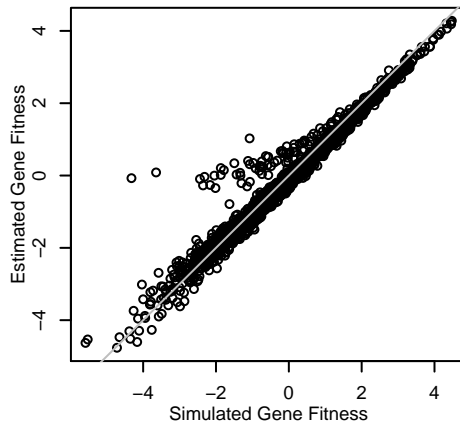

**C. Without Per-Gene Factor**

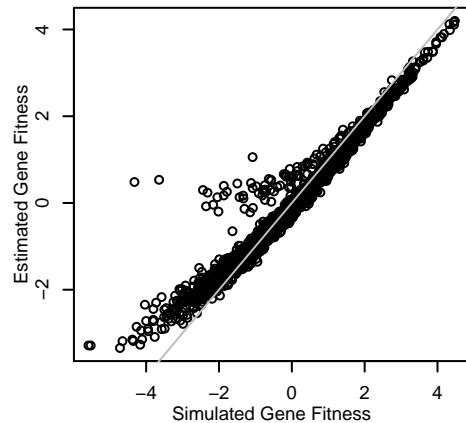

**D. 'Naive' Fitness (SB2B)**

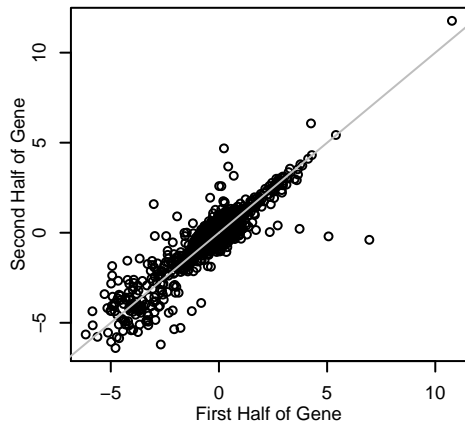

**E. Our Approach (SB2B)**

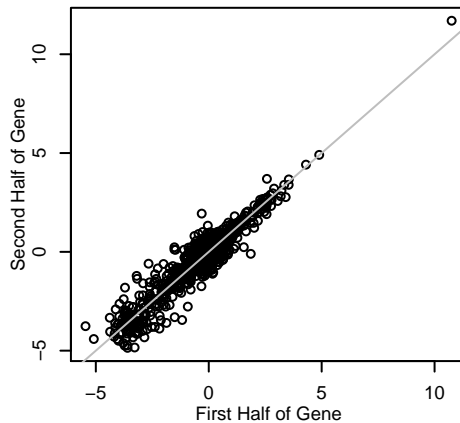

**Figure S4**
