# Supplementary material for: Rapid Quantification of Mutant Fitness in Diverse Bacteria by Sequencing Randomly Bar-Coded Transposons
Source: PubMed Central journal article supplement — mBio. 2015 May 12;6(3):e00306-15. doi: 10.1128/mBio.00306-15 (PMC4436071; doi:10.1128/mbio.00306-15), 2015-05-12
Supplement: mbo002152313sf5.pdf [file mbo002152313sf5.pdf]

**A.  $t(\text{Time0})$  in *E. coli***

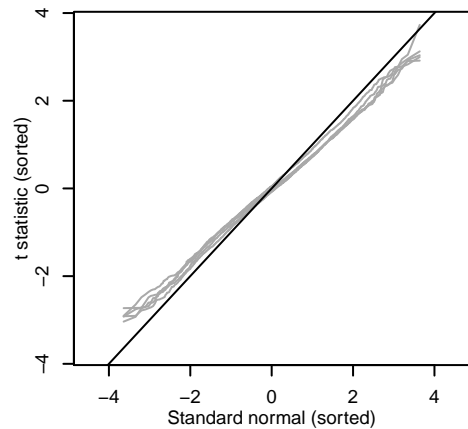

**B.  $t(\text{Time0})$  in *P. inhibens***

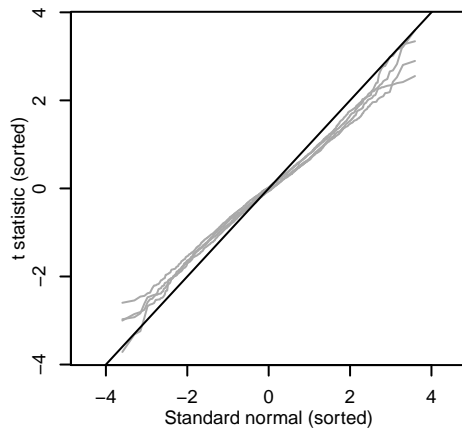

**C.  $t(\text{Time0})$  in *P. stutzeri***

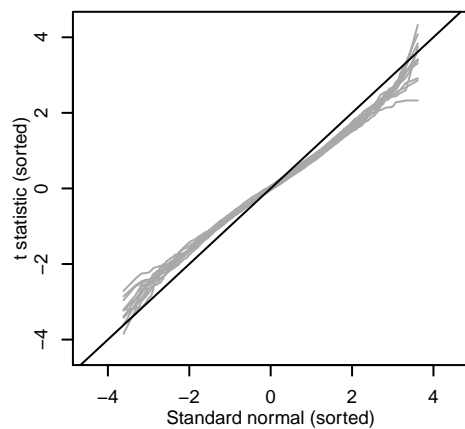

**D.  $t(\text{Time0})$  in *S. amazonensis***

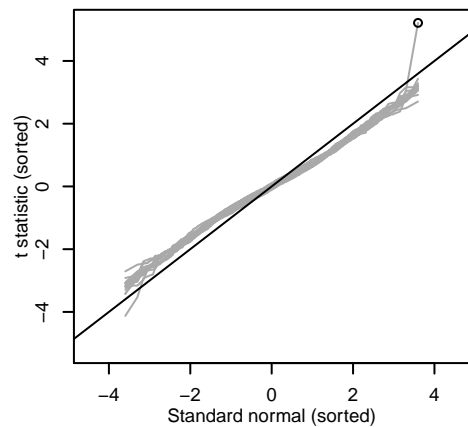

**E.  $t(\text{Time0})$  in *S. oneidensis***

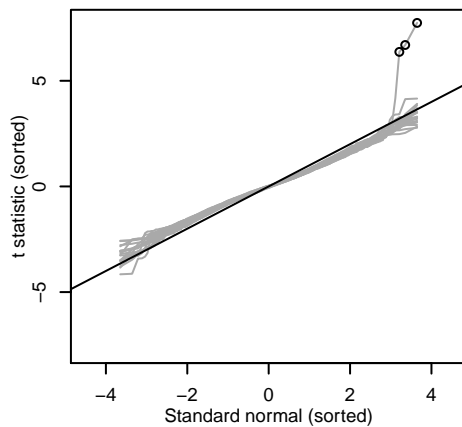

**Figure S5**
