# Supplementary material for: Rapid Quantification of Mutant Fitness in Diverse Bacteria by Sequencing Randomly Bar-Coded Transposons
Source: PubMed Central journal article supplement — mBio. 2015 May 12;6(3):e00306-15. doi: 10.1128/mBio.00306-15 (PMC4436071; doi:10.1128/mbio.00306-15), 2015-05-12
Supplement: mbo002152313st1.pdf [file mbo002152313st1.pdf]

Table S1. Strains used in this study

| Strain                                 | Description                                                      | Source                                  |
|----------------------------------------|------------------------------------------------------------------|-----------------------------------------|
| <i>Escherichia coli</i> strain BW25113 | wild-type strain                                                 | Coli Genetic Stock Center               |
| <i>Escherichia coli</i> strain WM3064  | conjugation donor strain                                         | William Metcalf, University of Illinois |
| <i>Shewanella amazonensis</i> SB2B     | wild-type strain                                                 | James Tiedje, Michigan State University |
| <i>Phaeobacter inhibens</i>            | wild-type strain                                                 | DSM 17395                               |
| <i>Shewanella oneidensis</i> MR-1      | wild-type strain                                                 | ATCC 700550                             |
| <i>Pseudomonas stutzeri</i> RCH2       | wild-type strain                                                 | Romy Chakraborty, LBNL                  |
| psRCH2_ML7                             | <i>Pseudomonas stutzeri</i> RCH2 transposon mutant library       | this study                              |
| SB2B_ML5                               | <i>Shewanella amazonensis</i> SB2B transposon mutant library     | this study                              |
| Phaeo_ML1                              | <i>Phaeobacter inhibens</i> transposon mutant library            | this study                              |
| KEIO_ML9                               | <i>Escherichia coli</i> strain BW25113 transposon mutant library | this study                              |
| MR1_ML3                                | <i>Shewanella oneidensis</i> MR-1 transposon mutant library      | this study                              |
| APA752                                 | <i>mariner</i> vector library pKMW3 in WM3064                    | this study                              |
| APA766                                 | <i>Tn5</i> vector library pKMW7 in WM3064                        | this study                              |
