# Supplementary material for: Rapid Quantification of Mutant Fitness in Diverse Bacteria by Sequencing Randomly Bar-Coded Transposons
Source: PubMed Central journal article supplement — mBio. 2015 May 12;6(3):e00306-15. doi: 10.1128/mBio.00306-15 (PMC4436071; doi:10.1128/mbio.00306-15), 2015-05-12
Supplement: mbo002152313st2.pdf [file mbo002152313st2.pdf]

**Table S2. Oligonucleotides used in this study.**

| Oligo name                     | Sequence (5' to 3')                                                                                         | PAGE purified | Index identifier | Index sequence | Notes                                                                                                        |
|--------------------------------|-------------------------------------------------------------------------------------------------------------|---------------|------------------|----------------|--------------------------------------------------------------------------------------------------------------|
| pRL27_Eng_oligo19              | GATGTCCACGAGGTCTCTNNNNNNNNNNNNNNNNNN<br>NNNNCGTACGCTGCAGGTCGAC                                              |               |                  |                | source of barcodes                                                                                           |
| Amp_barcode_s_FOR_Gateway_SbfI | GGGGACAAGTTTGTACAAAAAAGCAGGCTCCTGC<br>AGGGATGTCCACGAGGTCTCT                                                 |               |                  |                | amplify barcodes with BP Gateway cloning site and SbfI site (PAGE purified)                                  |
| Amp_barcode_s_REV_Gateway_FseI | GGGGACCACTTTGTACAAGAAAGCTGGGTGGCCG<br>GCCGTGCACCTGCAGCGTACG                                                 |               |                  |                | amplify barcodes with BP Gateway cloning site and FseI site (PAGE purified)                                  |
| pHIMAR_eng_oligo1              | CGCGAACCCAGAGTCCCGC                                                                                         |               |                  |                | amplify pHIMAR-RB1 to delete region                                                                          |
| pHIMAR_eng_oligo2              | GTTGGGTAACGCCAGGGTTTTTC                                                                                     |               |                  |                | amplify pHIMAR-RB1 to delete region                                                                          |
| pHIMAR_eng_oligo4              | ACACTGGCAGAGCATTACGCCCTGCAGGATGCAAT<br>GGGCCGGCCAGACCGGGGACTTATCAGCCAACCT<br>GTTATGT                        |               |                  |                | linker region                                                                                                |
| pHIMAR_eng_oligo5              | GCGGGACTCTGGGGTTCGCGACACTGGCAGAGC<br>ATTACGC                                                                |               |                  |                | amplify linker region                                                                                        |
| pHIMAR_eng_oligo6              | GAAAACCCTGGCGTTACCCAACACATAACAGGTTG<br>GCTGATA                                                              |               |                  |                | amplify linker region                                                                                        |
| pRL27_Eng_oligo22              | GGCTTGTTTTATCAGCCATC                                                                                        |               |                  |                | amplify pRL27 to delete region                                                                               |
| pRL27_Eng_oligo23              | GCGTAATGCTCTGCCAGTGT                                                                                        |               |                  |                | amplify pRL27 to delete region                                                                               |
| pRL27_Eng_oligo24              | CCTGCAGGATGCAATGGGCCGGCCGGTTGAGATG<br>TGATAAGAGACAGTCGAC                                                    |               |                  |                | linker region                                                                                                |
| pRL27_Eng_oligo25              | ACACTGGCAGAGCATTACGCCCTGCAGGATGCAAT<br>GGGCC                                                                |               |                  |                | amplify linker region                                                                                        |
| pRL27_Eng_oligo26              | GATGGCTGATGAAACCAAGCCGTCGACTGTCTCTT<br>ATACAC                                                               |               |                  |                | amplify linker region                                                                                        |
| EZ_Forward_Kan_pRL27           | CTGTCTTTATACACATCTTGTGTCTCAAATCTCT<br>GATGTTAC                                                              | yes           |                  |                | generate custom barcoded EZ-Tn5                                                                              |
| EZ_Reverse_Kan_pRL27           | CTGTCTTTATACACATCTGTCGACCTGCAGCGTA<br>CGNNNNNNNNNNNNNNNNNNNNNAGAGACCTCGT<br>GGACATCTTAGAAAACATCATCGAGCATCAA | yes           |                  |                | generate custom barcoded EZ-Tn5 transpososome                                                                |
| Mod2_Truseq                    | /5'P/GATCGGAAGAGCACACGTCTGAACTCCAGTCA                                                                       | yes           |                  |                | Illumina adapter for TnSeq protocol; 5'                                                                      |
| Mod2_TS_Univ                   | ACGCTCTTCCGATC*T                                                                                            | yes           |                  |                | Illumina adapter for TnSeq protocol; 3' T is phosphorothioate bonded                                         |
| Nspacer_barseq_pHIMAR          | ATGATACGGCGACCACCGAGATCTACACTCTTTCC<br>CTACACGACGCTCTCCGATCTNNNNNNCGCCCT<br>GCAGGGATGTCCACGAG               | yes           |                  |                | TnSeq oligo for amplifying transposon insertion sites; used for P. inhibens, P. stutzeri, S. amazonensis, S. |
| Nspacer_barseq_universal       | ATGATACGGCGACCACCGAGATCTACACTCTTTCC<br>CTACACGACGCTCTCCGATCTNNNNNNGATGTCC<br>ACGAGGTCT                      | yes           |                  |                | TnSeq oligo for amplifying transposon insertion sites; used for                                              |
| P7_MOD_TS_index1               | CAAGCAGAAGACGGCATAACGAGATCGTGATGTGA<br>CTGGAGTTCAGACGTGTGCTCTTCCGATCT                                       | yes           | index1           | ATCACG         | indexed TnSeq oligo                                                                                          |
| P7_MOD_TS_index2               | CAAGCAGAAGACGGCATAACGAGATACATCGGTGAC<br>TGGAGTTCAGACGTGTGCTCTTCCGATCT                                       | yes           | index2           | CGATGT         | indexed TnSeq oligo                                                                                          |
| P7_MOD_TS_index3               | CAAGCAGAAGACGGCATAACGAGATGCCTAAGTGA<br>CTGGAGTTCAGACGTGTGCTCTTCCGATCT                                       | yes           | index3           | TTAGGC         | indexed TnSeq oligo                                                                                          |
| P7_MOD_TS_index4               | CAAGCAGAAGACGGCATAACGAGATTGGTCAAGTGA<br>CTGGAGTTCAGACGTGTGCTCTTCCGATCT                                      | yes           | index4           | TGACCA         | indexed TnSeq oligo                                                                                          |
| P7_MOD_TS_index5               | CAAGCAGAAGACGGCATAACGAGATCACTGTGTGA<br>CTGGAGTTCAGACGTGTGCTCTTCCGATCT                                       | yes           | index5           | ACAGTG         | indexed TnSeq oligo                                                                                          |
| P7_MOD_TS_index6               | CAAGCAGAAGACGGCATAACGAGATATTGGCGTGAC<br>TGGAGTTCAGACGTGTGCTCTTCCGATCT                                       | yes           | index6           | GCCAAT         | indexed TnSeq oligo                                                                                          |
| P7_MOD_TS_index7               | CAAGCAGAAGACGGCATAACGAGATGATCTGGTGA<br>CTGGAGTTCAGACGTGTGCTCTTCCGATCT                                       | yes           | index7           | CAGATC         | indexed TnSeq oligo                                                                                          |

|                        |                                                                                      |     |         |              |                                                            |
|------------------------|--------------------------------------------------------------------------------------|-----|---------|--------------|------------------------------------------------------------|
| P7_MOD_TS_index8       | CAAGCAGAAGACGGCATAACGAGATTCAAGTGTGACTGGAGTTTCAGACGTGTGCTCTTCCGATCT                   | yes | index8  | ACTTGA       | indexed TnSeq oligo                                        |
| P7_MOD_TS_index9       | CAAGCAGAAGACGGCATAACGAGATCTGATCGTGACTGGAGTTTCAGACGTGTGCTCTTCCGATCT                   | yes | index9  | GATCAG       | indexed TnSeq oligo                                        |
| P7_MOD_TS_index10      | CAAGCAGAAGACGGCATAACGAGATAAGCTAGTGACTGGAGTTTCAGACGTGTGCTCTTCCGATCT                   | yes | index10 | TAGCTT       | indexed TnSeq oligo                                        |
| P7_MOD_TS_index11      | CAAGCAGAAGACGGCATAACGAGATGTAGCCGTGACTGGAGTTTCAGACGTGTGCTCTTCCGATCT                   | yes | index11 | GGCTAC       | indexed TnSeq oligo                                        |
| P7_MOD_TS_index12      | CAAGCAGAAGACGGCATAACGAGATTACAAGGTGACTGGAGTTTCAGACGTGTGCTCTTCCGATCT                   | yes | index12 | CTTGTA       | indexed TnSeq oligo                                        |
| P7_MOD_TS_index13      | CAAGCAGAAGACGGCATAACGAGATTTGACTGTGACTGGAGTTTCAGACGTGTGCTCTTCCGATCT                   | yes | index13 | AGTCAA       | indexed TnSeq oligo                                        |
| P7_MOD_TS_index14      | CAAGCAGAAGACGGCATAACGAGATGGAAGTGTGACTGGAGTTTCAGACGTGTGCTCTTCCGATCT                   | yes | index14 | AGTTCC       | indexed TnSeq oligo                                        |
| P7_MOD_TS_index15      | CAAGCAGAAGACGGCATAACGAGATTGACATGTGACTGGAGTTTCAGACGTGTGCTCTTCCGATCT                   | yes | index15 | ATGTCA       | indexed TnSeq oligo                                        |
| P7_MOD_TS_index16      | CAAGCAGAAGACGGCATAACGAGATGGACGGTGA CTGGAGTTTCAGACGTGTGCTCTTCCGATCT                   | yes | index16 | CCGTCC       | indexed TnSeq oligo                                        |
| Forward_primer_Nbarseq | CAAGCAGAAGACGGCATAACGAGCTCTTCCGATCTGATGTCCACGAGGTCTCT                                | yes |         |              | common F primer for BarSeq (used with "in-line" R primers) |
| H1_R_primer_Nbarseq    | AATGATACGGCGACCACCGAGATCTACACTCTTTCCTACACGACGCTCTTCCGATCTATCACGAGGTGACCTGCAGCGTACG   | yes | H1      | ATCACGA<br>G | "in-line" indexed BarSeq R primer                          |
| H2_R_primer_Nbarseq    | AATGATACGGCGACCACCGAGATCTACACTCTTTCCTACACGACGCTCTTCCGATCTCGATGTTCTGTCGACCTGCAGCGTACG | yes | H2      | CGATGTT<br>C | "in-line" indexed BarSeq R primer                          |
| H3_R_primer_Nbarseq    | AATGATACGGCGACCACCGAGATCTACACTCTTTCCTACACGACGCTCTTCCGATCTTTAGGCGAGTGCACCTGCAGCGTACG  | yes | H3      | TTAGGCG<br>A | "in-line" indexed BarSeq R primer                          |
| H4_R_primer_Nbarseq    | AATGATACGGCGACCACCGAGATCTACACTCTTTCCTACACGACGCTCTTCCGATCTTGACCAATGTGACCTGCAGCGTACG   | yes | H4      | TGACCAAT     | "in-line" indexed BarSeq R primer                          |
| H5_R_primer_Nbarseq    | AATGATACGGCGACCACCGAGATCTACACTCTTTCCTACACGACGCTCTTCCGATCTACAGTGCTGTGACCTGCAGCGTACG   | yes | H5      | ACAGTGC<br>T | "in-line" indexed BarSeq R primer                          |
| H6_R_primer_Nbarseq    | AATGATACGGCGACCACCGAGATCTACACTCTTTCCTACACGACGCTCTTCCGATCTGCCAATGTGTGACCTGCAGCGTACG   | yes | H6      | GCCAATG<br>T | "in-line" indexed BarSeq R primer                          |
| H7_R_primer_Nbarseq    | AATGATACGGCGACCACCGAGATCTACACTCTTTCCTACACGACGCTCTTCCGATCTCAGATCGAGTGCACCTGCAGCGTACG  | yes | H7      | CAGATCG<br>A | "in-line" indexed BarSeq R primer                          |
| H8_R_primer_Nbarseq    | AATGATACGGCGACCACCGAGATCTACACTCTTTCCTACACGACGCTCTTCCGATCTACTTGAAGTGCACCTGCAGCGTACG   | yes | H8      | ACTTGAAA     | "in-line" indexed BarSeq R primer                          |
| H9_R_primer_Nbarseq    | AATGATACGGCGACCACCGAGATCTACACTCTTTCCTACACGACGCTCTTCCGATCTGATCAGTGGTGCACCTGCAGCGTACG  | yes | H9      | GATCAGT<br>G | "in-line" indexed BarSeq R primer                          |
| H10_R_primer_Nbarseq   | AATGATACGGCGACCACCGAGATCTACACTCTTTCCTACACGACGCTCTTCCGATCTTCTACCTCGTGCACCTGCAGCGTACG  | yes | H10     | TCTACCTC     | "in-line" indexed BarSeq R primer                          |
| H11_R_primer_Nbarseq   | AATGATACGGCGACCACCGAGATCTACACTCTTTCCTACACGACGCTCTTCCGATCTCTTGATGGTGCACCTGCAGCGTACG   | yes | H11     | CTTGATG      | "in-line" indexed BarSeq R primer                          |
| H12_R_primer_Nbarseq   | AATGATACGGCGACCACCGAGATCTACACTCTTTCCTACACGACGCTCTTCCGATCTTAGCTTCCGTGCACCTGCAGCGTACG  | yes | H12     | TAGCTTCC     | "in-line" indexed BarSeq R primer                          |
| H13_R_primer_Nbarseq   | AATGATACGGCGACCACCGAGATCTACACTCTTTCCTACACGACGCTCTTCCGATCTGGCTACCAAGTGCACCTGCAGCGTACG | yes | H13     | GGCTACC<br>A | "in-line" indexed BarSeq R primer                          |
| H14_R_primer_Nbarseq   | AATGATACGGCGACCACCGAGATCTACACTCTTTCCTACACGACGCTCTTCCGATCTATGCACTTGTGACCTGCAGCGTACG   | yes | H14     | ATGCACTT     | "in-line" indexed BarSeq R primer                          |

|                      |                                                                                               |     |     |               |                                      |
|----------------------|-----------------------------------------------------------------------------------------------|-----|-----|---------------|--------------------------------------|
| H15_R_primer_Nbarseq | AATGATACGGCGACCACCGAGATCTACACTCTTTC<br>CCTACACGACGCTCTCCGATCTGACGGAACGTC<br>GACCTGCAGCGTACG   | yes | H15 | GACGGAA<br>C  | "in-line" indexed BarSeq<br>R primer |
| H16_R_primer_Nbarseq | AATGATACGGCGACCACCGAGATCTACACTCTTTC<br>CCTACACGACGCTCTCCGATCTAGCCTTGGGTCTG<br>ACCTGCAGCGTACG  | yes | H16 | AGCCTTG<br>G  | "in-line" indexed BarSeq<br>R primer |
| H17_R_primer_Nbarseq | AATGATACGGCGACCACCGAGATCTACACTCTTTC<br>CCTACACGACGCTCTCCGATCTCCGTAGAGGTCTG<br>ACCTGCAGCGTACG  | yes | H17 | CCGTAGA<br>G  | "in-line" indexed BarSeq<br>R primer |
| H18_R_primer_Nbarseq | AATGATACGGCGACCACCGAGATCTACACTCTTTC<br>CCTACACGACGCTCTCCGATCTGTGAGACTGTCTG<br>ACCTGCAGCGTACG  | yes | H18 | GTGAGAC<br>T  | "in-line" indexed BarSeq<br>R primer |
| H19_R_primer_Nbarseq | AATGATACGGCGACCACCGAGATCTACACTCTTTC<br>CCTACACGACGCTCTCCGATCTAATGCTCAGTCTG<br>ACCTGCAGCGTACG  | yes | H19 | AATGCTCA      | "in-line" indexed BarSeq<br>R primer |
| H20_R_primer_Nbarseq | AATGATACGGCGACCACCGAGATCTACACTCTTTC<br>CCTACACGACGCTCTCCGATCTGCATCGTAGTCTG<br>ACCTGCAGCGTACG  | yes | H20 | GCATCGTA      | "in-line" indexed BarSeq<br>R primer |
| H21_R_primer_Nbarseq | AATGATACGGCGACCACCGAGATCTACACTCTTTC<br>CCTACACGACGCTCTCCGATCTCGAACAGCGTCTG<br>GACCTGCAGCGTACG | yes | H21 | CGAACAG<br>C  | "in-line" indexed BarSeq<br>R primer |
| H22_R_primer_Nbarseq | AATGATACGGCGACCACCGAGATCTACACTCTTTC<br>CCTACACGACGCTCTCCGATCTTCGGAAGGGTCTG<br>GACCTGCAGCGTACG | yes | H22 | TCGGAAG<br>G  | "in-line" indexed BarSeq<br>R primer |
| H23_R_primer_Nbarseq | AATGATACGGCGACCACCGAGATCTACACTCTTTC<br>CCTACACGACGCTCTCCGATCTTTCTGTGCGGTCTG<br>ACCTGCAGCGTACG | yes | H23 | TTCTGTC<br>G  | "in-line" indexed BarSeq<br>R primer |
| H24_R_primer_Nbarseq | AATGATACGGCGACCACCGAGATCTACACTCTTTC<br>CCTACACGACGCTCTCCGATCTGTACTCACGTCTG<br>ACCTGCAGCGTACG  | yes | H24 | GTACTION<br>C | "in-line" indexed BarSeq<br>R primer |
| H25_R_primer_Nbarseq | AATGATACGGCGACCACCGAGATCTACACTCTTTC<br>CCTACACGACGCTCTCCGATCTAGTAATACGTCTG<br>ACCTGCAGCGTACG  | yes | H25 | AGTAATAC      | "in-line" indexed BarSeq<br>R primer |
| H26_R_primer_Nbarseq | AATGATACGGCGACCACCGAGATCTACACTCTTTC<br>CCTACACGACGCTCTCCGATCTCAAGATATGTCTG<br>ACCTGCAGCGTACG  | yes | H26 | CAAGATAT      | "in-line" indexed BarSeq<br>R primer |
| H27_R_primer_Nbarseq | AATGATACGGCGACCACCGAGATCTACACTCTTTC<br>CCTACACGACGCTCTCCGATCTTGTTGGTGTCTG<br>ACCTGCAGCGTACG   | yes | H27 | TGTTTGG<br>T  | "in-line" indexed BarSeq<br>R primer |
| H28_R_primer_Nbarseq | AATGATACGGCGACCACCGAGATCTACACTCTTTC<br>CCTACACGACGCTCTCCGATCTCTCCAACCGTCTG<br>ACCTGCAGCGTACG  | yes | H28 | CTCCAAC<br>C  | "in-line" indexed BarSeq<br>R primer |
| H29_R_primer_Nbarseq | AATGATACGGCGACCACCGAGATCTACACTCTTTC<br>CCTACACGACGCTCTCCGATCTAAATTCTGGTCTG<br>ACCTGCAGCGTACG  | yes | H29 | AAATTCTG      | "in-line" indexed BarSeq<br>R primer |
| H30_R_primer_Nbarseq | AATGATACGGCGACCACCGAGATCTACACTCTTTC<br>CCTACACGACGCTCTCCGATCTCCCGCCAAGTCTG<br>GACCTGCAGCGTACG | yes | H30 | CCCGCCA<br>A  | "in-line" indexed BarSeq<br>R primer |
| H31_R_primer_Nbarseq | AATGATACGGCGACCACCGAGATCTACACTCTTTC<br>CCTACACGACGCTCTCCGATCTTACAAATAGTCTG<br>ACCTGCAGCGTACG  | yes | H31 | TACAAATA      | "in-line" indexed BarSeq<br>R primer |
| H32_R_primer_Nbarseq | AATGATACGGCGACCACCGAGATCTACACTCTTTC<br>CCTACACGACGCTCTCCGATCTGGGCTATAGTCTG<br>ACCTGCAGCGTACG  | yes | H32 | GGGCTATA      | "in-line" indexed BarSeq<br>R primer |
| H33_R_primer_Nbarseq | AATGATACGGCGACCACCGAGATCTACACTCTTTC<br>CCTACACGACGCTCTCCGATCTTTTCGGACGTCTG<br>ACCTGCAGCGTACG  | yes | H33 | TTTCGGA<br>C  | "in-line" indexed BarSeq<br>R primer |
| H34_R_primer_Nbarseq | AATGATACGGCGACCACCGAGATCTACACTCTTTC<br>CCTACACGACGCTCTCCGATCTTGCGCGTCTGTC<br>GACCTGCAGCGTACG  | yes | H34 | TGCGCGT<br>C  | "in-line" indexed BarSeq<br>R primer |
| H35_R_primer_Nbarseq | AATGATACGGCGACCACCGAGATCTACACTCTTTC<br>CCTACACGACGCTCTCCGATCTCCCGCTGGTCTG<br>ACCTGCAGCGTACG   | yes | H35 | TCCCGCT<br>G  | "in-line" indexed BarSeq<br>R primer |

|                      |                                                                                              |     |       |              |                                              |
|----------------------|----------------------------------------------------------------------------------------------|-----|-------|--------------|----------------------------------------------|
| H36_R_primer_Nbarseq | AATGATACGGCGACCACCGAGATCTACACTCTTTC<br>CCTACACGACGCTCTCCGATCTGTTTCAGGGTTCG<br>ACCTGCAGCGTACG | yes | H36   | GTTTCAG<br>G | "in-line" indexed BarSeq<br>R primer         |
| H37_R_primer_Nbarseq | AATGATACGGCGACCACCGAGATCTACACTCTTTC<br>CCTACACGACGCTCTCCGATCTGAGGGGGGTC<br>GACCTGCAGCGTACG   | yes | H37   | GGAGGGG<br>G | "in-line" indexed BarSeq<br>R primer         |
| H38_R_primer_Nbarseq | AATGATACGGCGACCACCGAGATCTACACTCTTTC<br>CCTACACGACGCTCTCCGATCTGCTGTTAGGTTCG<br>ACCTGCAGCGTACG | yes | H38   | GCTGTTA<br>G | "in-line" indexed BarSeq<br>R primer         |
| H39_R_primer_Nbarseq | AATGATACGGCGACCACCGAGATCTACACTCTTTC<br>CCTACACGACGCTCTCCGATCTGAGTGTGAGTTCG<br>ACCTGCAGCGTACG | yes | H39   | GAGTGTG<br>A | "in-line" indexed BarSeq<br>R primer         |
| H40_R_primer_Nbarseq | AATGATACGGCGACCACCGAGATCTACACTCTTTC<br>CCTACACGACGCTCTCCGATCTCGTCCCCGGTTC<br>GACCTGCAGCGTACG | yes | H40   | CGTCCCC<br>G | "in-line" indexed BarSeq<br>R primer         |
| H41_R_primer_Nbarseq | AATGATACGGCGACCACCGAGATCTACACTCTTTC<br>CCTACACGACGCTCTCCGATCTCCTCATCAGTTCG<br>ACCTGCAGCGTACG | yes | H41   | CCTCATCA     | "in-line" indexed BarSeq<br>R primer         |
| H42_R_primer_Nbarseq | AATGATACGGCGACCACCGAGATCTACACTCTTTC<br>CCTACACGACGCTCTCCGATCTCCACGACAGTTCG<br>ACCTGCAGCGTACG | yes | H42   | CCACGAC<br>A | "in-line" indexed BarSeq<br>R primer         |
| H43_R_primer_Nbarseq | AATGATACGGCGACCACCGAGATCTACACTCTTTC<br>CCTACACGACGCTCTCCGATCTCATTGGCTGTTCG<br>ACCTGCAGCGTACG | yes | H43   | CATTGGC<br>T | "in-line" indexed BarSeq<br>R primer         |
| H44_R_primer_Nbarseq | AATGATACGGCGACCACCGAGATCTACACTCTTTC<br>CCTACACGACGCTCTCCGATCTAGGGGCCCGTTC<br>GACCTGCAGCGTACG | yes | H44   | AGGGGCC<br>C | "in-line" indexed BarSeq<br>R primer         |
| H45_R_primer_Nbarseq | AATGATACGGCGACCACCGAGATCTACACTCTTTC<br>CCTACACGACGCTCTCCGATCTACGACACTGTTCG<br>ACCTGCAGCGTACG | yes | H45   | ACGACAC<br>T | "in-line" indexed BarSeq<br>R primer         |
| H46_R_primer_Nbarseq | AATGATACGGCGACCACCGAGATCTACACTCTTTC<br>CCTACACGACGCTCTCCGATCTACCGACGCGTTCG<br>ACCTGCAGCGTACG | yes | H46   | ACCGACG<br>C | "in-line" indexed BarSeq<br>R primer         |
| H47_R_primer_Nbarseq | AATGATACGGCGACCACCGAGATCTACACTCTTTC<br>CCTACACGACGCTCTCCGATCTTATAGTATGTTCGA<br>CCTGCAGCGTACG | yes | H47   | TATAGTAT     | "in-line" indexed BarSeq<br>R primer         |
| H48_R_primer_Nbarseq | AATGATACGGCGACCACCGAGATCTACACTCTTTC<br>CCTACACGACGCTCTCCGATCTAACTCAGTGTTCG<br>ACCTGCAGCGTACG | yes | H48   | AACTCAG<br>T | "in-line" indexed BarSeq<br>R primer         |
| Barseq_P1            | AATGATACGGCGACCACCGAGATCTACACTCTTTC<br>CCTACACGACGCTCTCCGATCTNNNNNGTCGAC<br>CTGCAGCGTACG     | yes |       |              | Common primer for<br>"truseq-indexed" BarSeq |
| Barseq_P2_IT001      | CAAGCAGAAGACGGCATAACGAGATCGTGATGTGA<br>CTGGAGTTCAGACGTGTGCTCTTCCGATCTGATGT<br>CCACGAGGTCTCT  | yes | IT001 | ATCACG       | truseq-derived indexed<br>BarSeq primer      |
| Barseq_P2_IT002      | CAAGCAGAAGACGGCATAACGAGATACATCGGTGAC<br>TGGAGTTCAGACGTGTGCTCTTCCGATCTGATGT<br>CACGAGGTCTCT   | yes | IT002 | CGATGT       | truseq-derived indexed<br>BarSeq primer      |
| Barseq_P2_IT003      | CAAGCAGAAGACGGCATAACGAGATGCCTAAGTGA<br>CTGGAGTTCAGACGTGTGCTCTTCCGATCTGATGT<br>CCACGAGGTCTCT  | yes | IT003 | TTAGGC       | truseq-derived indexed<br>BarSeq primer      |
| Barseq_P2_IT004      | CAAGCAGAAGACGGCATAACGAGATTGGTCAAGTGA<br>CTGGAGTTCAGACGTGTGCTCTTCCGATCTGATGT<br>CCACGAGGTCTCT | yes | IT004 | TGACCA       | truseq-derived indexed<br>BarSeq primer      |
| Barseq_P2_IT005      | CAAGCAGAAGACGGCATAACGAGATCACTGTGTGA<br>CTGGAGTTCAGACGTGTGCTCTTCCGATCTGATGT<br>CCACGAGGTCTCT  | yes | IT005 | ACAGTG       | truseq-derived indexed<br>BarSeq primer      |
| Barseq_P2_IT006      | CAAGCAGAAGACGGCATAACGAGATATTGGCGTAC<br>TGGAGTTCAGACGTGTGCTCTTCCGATCTGATGT<br>CACGAGGTCTCT    | yes | IT006 | GCCAAT       | truseq-derived indexed<br>BarSeq primer      |
| Barseq_P2_IT007      | CAAGCAGAAGACGGCATAACGAGATGATCTGGTGA<br>CTGGAGTTCAGACGTGTGCTCTTCCGATCTGATGT<br>CCACGAGGTCTCT  | yes | IT007 | CAGATC       | truseq-derived indexed<br>BarSeq primer      |

|                     |                                                                                              |     |       |         |                                         |
|---------------------|----------------------------------------------------------------------------------------------|-----|-------|---------|-----------------------------------------|
| Barseq_P2_IT<br>008 | CAAGCAGAAGACGGCATAACGAGATTCAAGTGTGAC<br>TGGAGTTCAGACGTGTGCTCTTCCGATCTGATGTC<br>CACGAGGTCTCT  | yes | IT008 | ACTTGA  | truseq-derived indexed<br>BarSeq primer |
| Barseq_P2_IT<br>009 | CAAGCAGAAGACGGCATAACGAGATCTGATCGTGAC<br>TGGAGTTCAGACGTGTGCTCTTCCGATCTGATGTC<br>CACGAGGTCTCT  | yes | IT009 | GATCAG  | truseq-derived indexed<br>BarSeq primer |
| Barseq_P2_IT<br>010 | CAAGCAGAAGACGGCATAACGAGATAAGCTAGTGAC<br>TGGAGTTCAGACGTGTGCTCTTCCGATCTGATGTC<br>CACGAGGTCTCT  | yes | IT010 | TAGCTT  | truseq-derived indexed<br>BarSeq primer |
| Barseq_P2_IT<br>011 | CAAGCAGAAGACGGCATAACGAGATGTAGCCGTGA<br>CTGGAGTTCAGACGTGTGCTCTTCCGATCTGATGT<br>CCACGAGGTCTCT  | yes | IT011 | GGCTAC  | truseq-derived indexed<br>BarSeq primer |
| Barseq_P2_IT<br>012 | CAAGCAGAAGACGGCATAACGAGATTACAAGGTGAC<br>TGGAGTTCAGACGTGTGCTCTTCCGATCTGATGTC<br>CACGAGGTCTCT  | yes | IT012 | CTTGTA  | truseq-derived indexed<br>BarSeq primer |
| Barseq_P2_IT<br>013 | CAAGCAGAAGACGGCATAACGAGATTTGACTGTGAC<br>TGGAGTTCAGACGTGTGCTCTTCCGATCTGATGTC<br>CACGAGGTCTCT  | yes | IT013 | AGTCAA  | truseq-derived indexed<br>BarSeq primer |
| Barseq_P2_IT<br>014 | CAAGCAGAAGACGGCATAACGAGATGGAAGTGTGA<br>CTGGAGTTCAGACGTGTGCTCTTCCGATCTGATGT<br>CCACGAGGTCTCT  | yes | IT014 | AGTTCC  | truseq-derived indexed<br>BarSeq primer |
| Barseq_P2_IT<br>015 | CAAGCAGAAGACGGCATAACGAGATTGACATGTGAC<br>TGGAGTTCAGACGTGTGCTCTTCCGATCTGATGTC<br>CACGAGGTCTCT  | yes | IT015 | ATGTCA  | truseq-derived indexed<br>BarSeq primer |
| Barseq_P2_IT<br>016 | CAAGCAGAAGACGGCATAACGAGATGGACGGGTGA<br>CTGGAGTTCAGACGTGTGCTCTTCCGATCTGATGT<br>CCACGAGGTCTCT  | yes | IT016 | CCGTCC  | truseq-derived indexed<br>BarSeq primer |
| Barseq_P2_IT<br>017 | CAAGCAGAAGACGGCATAACGAGATCTCTACGTGAC<br>TGGAGTTCAGACGTGTGCTCTTCCGATCTGATGTC<br>CACGAGGTCTCT  | yes | IT017 | GTAGAG  | truseq-derived indexed<br>BarSeq primer |
| Barseq_P2_IT<br>018 | CAAGCAGAAGACGGCATAACGAGATGCGGACGTGA<br>CTGGAGTTCAGACGTGTGCTCTTCCGATCTGATGT<br>CCACGAGGTCTCT  | yes | IT018 | GTCCGC  | truseq-derived indexed<br>BarSeq primer |
| Barseq_P2_IT<br>019 | CAAGCAGAAGACGGCATAACGAGATTTTACGTGAC<br>TGGAGTTCAGACGTGTGCTCTTCCGATCTGATGTC<br>CACGAGGTCTCT   | yes | IT019 | GTGAAA  | truseq-derived indexed<br>BarSeq primer |
| Barseq_P2_IT<br>020 | CAAGCAGAAGACGGCATAACGAGATGGCCACGTGA<br>CTGGAGTTCAGACGTGTGCTCTTCCGATCTGATGT<br>CCACGAGGTCTCT  | yes | IT020 | GTGGCC  | truseq-derived indexed<br>BarSeq primer |
| Barseq_P2_IT<br>021 | CAAGCAGAAGACGGCATAACGAGATCGAAACGTGA<br>CTGGAGTTCAGACGTGTGCTCTTCCGATCTGATGT<br>CCACGAGGTCTCT  | yes | IT021 | GTTTCG  | truseq-derived indexed<br>BarSeq primer |
| Barseq_P2_IT<br>022 | CAAGCAGAAGACGGCATAACGAGATCGTACGGTGA<br>CTGGAGTTCAGACGTGTGCTCTTCCGATCTGATGT<br>CCACGAGGTCTCT  | yes | IT022 | CGTACG  | truseq-derived indexed<br>BarSeq primer |
| Barseq_P2_IT<br>023 | CAAGCAGAAGACGGCATAACGAGATCCACTCGTGA<br>CTGGAGTTCAGACGTGTGCTCTTCCGATCTGATGT<br>CCACGAGGTCTCT  | yes | IT023 | GAGTGG  | truseq-derived indexed<br>BarSeq primer |
| Barseq_P2_IT<br>024 | CAAGCAGAAGACGGCATAACGAGATGCTACCGTGA<br>CTGGAGTTCAGACGTGTGCTCTTCCGATCTGATGT<br>CCACGAGGTCTCT  | yes | IT024 | GGTAGC  | truseq-derived indexed<br>BarSeq primer |
| Barseq_P2_IT<br>025 | CAAGCAGAAGACGGCATAACGAGATATCAGTGTGAC<br>TGGAGTTCAGACGTGTGCTCTTCCGATCTGATGTC<br>CACGAGGTCTCT  | yes | IT025 | ACTGAT  | truseq-derived indexed<br>BarSeq primer |
| Barseq_P2_IT<br>026 | CAAGCAGAAGACGGCATAACGAGATGCTCATGTGAC<br>TGGAGTTCAGACGTGTGCTCTTCCGATCTGATGTC<br>CACGAGGTCTCT  | yes | IT026 | ATGAGC  | truseq-derived indexed<br>BarSeq primer |
| Barseq_P2_IT<br>027 | CAAGCAGAAGACGGCATAACGAGATAGGAATGTGAC<br>TGGAGTTCAGACGTGTGCTCTTCCGATCTGATGTC<br>CACGAGGTCTCT  | yes | IT027 | ATTCTT  | truseq-derived indexed<br>BarSeq primer |
| Barseq_P2_IT<br>028 | CAAGCAGAAGACGGCATAACGAGATCTTTGGTGTGAC<br>TGGAGTTCAGACGTGTGCTCTTCCGATCTGATGTC<br>CACGAGGTCTCT | yes | IT028 | CAAAAAG | truseq-derived indexed<br>BarSeq primer |

|                     |                                                                                             |     |       |        |                                         |
|---------------------|---------------------------------------------------------------------------------------------|-----|-------|--------|-----------------------------------------|
| Barseq_P2_IT<br>029 | CAAGCAGAAGACGGCATAACGAGATTAGTTGGTGAC<br>TGGAGTTCAGACGTGTGCTCTTCCGATCTGATGTC<br>CACGAGGTCTCT | yes | IT029 | CAACTA | truseq-derived indexed<br>BarSeq primer |
| Barseq_P2_IT<br>030 | CAAGCAGAAGACGGCATAACGAGATCCGGTGGTGA<br>CTGGAGTTCAGACGTGTGCTCTTCCGATCTGATGT<br>CCACGAGGTCTCT | yes | IT030 | CACCGG | truseq-derived indexed<br>BarSeq primer |
| Barseq_P2_IT<br>031 | CAAGCAGAAGACGGCATAACGAGATATCGTGGTGAC<br>TGGAGTTCAGACGTGTGCTCTTCCGATCTGATGTC<br>CACGAGGTCTCT | yes | IT031 | CACGAT | truseq-derived indexed<br>BarSeq primer |
| Barseq_P2_IT<br>032 | CAAGCAGAAGACGGCATAACGAGATTGAGTGGTGA<br>CTGGAGTTCAGACGTGTGCTCTTCCGATCTGATGT<br>CCACGAGGTCTCT | yes | IT032 | CACTCA | truseq-derived indexed<br>BarSeq primer |
| Barseq_P2_IT<br>033 | CAAGCAGAAGACGGCATAACGAGATCGCCTGGTGA<br>CTGGAGTTCAGACGTGTGCTCTTCCGATCTGATGT<br>CCACGAGGTCTCT | yes | IT033 | CAGGCG | truseq-derived indexed<br>BarSeq primer |
| Barseq_P2_IT<br>034 | CAAGCAGAAGACGGCATAACGAGATGCCATGGTGA<br>CTGGAGTTCAGACGTGTGCTCTTCCGATCTGATGT<br>CCACGAGGTCTCT | yes | IT034 | CATGGC | truseq-derived indexed<br>BarSeq primer |
| Barseq_P2_IT<br>035 | CAAGCAGAAGACGGCATAACGAGATAAAATGGTGAC<br>TGGAGTTCAGACGTGTGCTCTTCCGATCTGATGTC<br>CACGAGGTCTCT | yes | IT035 | CATTTT | truseq-derived indexed<br>BarSeq primer |
| Barseq_P2_IT<br>036 | CAAGCAGAAGACGGCATAACGAGATTGTTGGGTGA<br>CTGGAGTTCAGACGTGTGCTCTTCCGATCTGATGT<br>CCACGAGGTCTCT | yes | IT036 | CCAACA | truseq-derived indexed<br>BarSeq primer |
| Barseq_P2_IT<br>037 | CAAGCAGAAGACGGCATAACGAGATATTCCGGTGAC<br>TGGAGTTCAGACGTGTGCTCTTCCGATCTGATGTC<br>CACGAGGTCTCT | yes | IT037 | CGGAAT | truseq-derived indexed<br>BarSeq primer |
| Barseq_P2_IT<br>038 | CAAGCAGAAGACGGCATAACGAGATAGCTAGGTGA<br>CTGGAGTTCAGACGTGTGCTCTTCCGATCTGATGT<br>CCACGAGGTCTCT | yes | IT038 | CTAGCT | truseq-derived indexed<br>BarSeq primer |
| Barseq_P2_IT<br>039 | CAAGCAGAAGACGGCATAACGAGATGTATAGGTGAC<br>TGGAGTTCAGACGTGTGCTCTTCCGATCTGATGTC<br>CACGAGGTCTCT | yes | IT039 | CTATAC | truseq-derived indexed<br>BarSeq primer |
| Barseq_P2_IT<br>040 | CAAGCAGAAGACGGCATAACGAGATTCTGAGGTGA<br>CTGGAGTTCAGACGTGTGCTCTTCCGATCTGATGT<br>CCACGAGGTCTCT | yes | IT040 | CTCAGA | truseq-derived indexed<br>BarSeq primer |
| Barseq_P2_IT<br>041 | CAAGCAGAAGACGGCATAACGAGATGCTGTCGTGA<br>CTGGAGTTCAGACGTGTGCTCTTCCGATCTGATGT<br>CCACGAGGTCTCT | yes | IT041 | GACGAC | truseq-derived indexed<br>BarSeq primer |
| Barseq_P2_IT<br>042 | CAAGCAGAAGACGGCATAACGAGATCGATTAGTGAC<br>TGGAGTTCAGACGTGTGCTCTTCCGATCTGATGTC<br>CACGAGGTCTCT | yes | IT042 | TAATCG | truseq-derived indexed<br>BarSeq primer |
| Barseq_P2_IT<br>043 | CAAGCAGAAGACGGCATAACGAGATGCTGTAGTGA<br>CTGGAGTTCAGACGTGTGCTCTTCCGATCTGATGT<br>CCACGAGGTCTCT | yes | IT043 | TACAGC | truseq-derived indexed<br>BarSeq primer |
| Barseq_P2_IT<br>044 | CAAGCAGAAGACGGCATAACGAGATATTATAGTGAC<br>TGGAGTTCAGACGTGTGCTCTTCCGATCTGATGTC<br>CACGAGGTCTCT | yes | IT044 | TATAAT | truseq-derived indexed<br>BarSeq primer |
| Barseq_P2_IT<br>045 | CAAGCAGAAGACGGCATAACGAGATGAATGAGTGA<br>CTGGAGTTCAGACGTGTGCTCTTCCGATCTGATGT<br>CCACGAGGTCTCT | yes | IT045 | TCATTC | truseq-derived indexed<br>BarSeq primer |
| Barseq_P2_IT<br>046 | CAAGCAGAAGACGGCATAACGAGATTCCGGAGTGA<br>CTGGAGTTCAGACGTGTGCTCTTCCGATCTGATGT<br>CCACGAGGTCTCT | yes | IT046 | TCCCGA | truseq-derived indexed<br>BarSeq primer |
| Barseq_P2_IT<br>047 | CAAGCAGAAGACGGCATAACGAGATCTTCGAGTGA<br>CTGGAGTTCAGACGTGTGCTCTTCCGATCTGATGT<br>CCACGAGGTCTCT | yes | IT047 | TCGAAG | truseq-derived indexed<br>BarSeq primer |
| Barseq_P2_IT<br>048 | CAAGCAGAAGACGGCATAACGAGATTGCCGAGTGA<br>CTGGAGTTCAGACGTGTGCTCTTCCGATCTGATGT<br>CCACGAGGTCTCT | yes | IT048 | TCGGCA | truseq-derived indexed<br>BarSeq primer |
| Barseq_P2_IT<br>049 | CAAGCAGAAGACGGCATAACGAGATATGTTTGTGAC<br>TGGAGTTCAGACGTGTGCTCTTCCGATCTGATGTC<br>CACGAGGTCTCT | yes | IT049 | AAACAT | truseq-derived indexed<br>BarSeq primer |

|                     |                                                                                             |     |       |        |                                         |
|---------------------|---------------------------------------------------------------------------------------------|-----|-------|--------|-----------------------------------------|
| Barseq_P2_IT<br>050 | CAAGCAGAAGACGGCATAACGAGATTGCTTTGTGAC<br>TGGAGTTCAGACGTGTGCTCTTCCGATCTGATGTC<br>CACGAGGTCTCT | yes | IT050 | AAAGCA | truseq-derived indexed<br>BarSeq primer |
| Barseq_P2_IT<br>051 | CAAGCAGAAGACGGCATAACGAGATGCATTTGTGAC<br>TGGAGTTCAGACGTGTGCTCTTCCGATCTGATGTC<br>CACGAGGTCTCT | yes | IT051 | AAATGC | truseq-derived indexed<br>BarSeq primer |
| Barseq_P2_IT<br>052 | CAAGCAGAAGACGGCATAACGAGATTTTGTGAC<br>TGGAGTTCAGACGTGTGCTCTTCCGATCTGATGTC<br>CACGAGGTCTCT    | yes | IT052 | AACAAA | truseq-derived indexed<br>BarSeq primer |
| Barseq_P2_IT<br>053 | CAAGCAGAAGACGGCATAACGAGATCAAGTTGTGAC<br>TGGAGTTCAGACGTGTGCTCTTCCGATCTGATGTC<br>CACGAGGTCTCT | yes | IT053 | AACTTG | truseq-derived indexed<br>BarSeq primer |
| Barseq_P2_IT<br>054 | CAAGCAGAAGACGGCATAACGAGATAGTCTTGTGAC<br>TGGAGTTCAGACGTGTGCTCTTCCGATCTGATGTC<br>CACGAGGTCTCT | yes | IT054 | AAGACT | truseq-derived indexed<br>BarSeq primer |
| Barseq_P2_IT<br>055 | CAAGCAGAAGACGGCATAACGAGATTCGTTGTGAC<br>TGGAGTTCAGACGTGTGCTCTTCCGATCTGATGTC<br>CACGAGGTCTCT  | yes | IT055 | AAGCGA | truseq-derived indexed<br>BarSeq primer |
| Barseq_P2_IT<br>056 | CAAGCAGAAGACGGCATAACGAGATGTCTTGTGAC<br>TGGAGTTCAGACGTGTGCTCTTCCGATCTGATGTC<br>CACGAGGTCTCT  | yes | IT056 | AAGGAC | truseq-derived indexed<br>BarSeq primer |
| Barseq_P2_IT<br>057 | CAAGCAGAAGACGGCATAACGAGATCCTATTGTGAC<br>TGGAGTTCAGACGTGTGCTCTTCCGATCTGATGTC<br>CACGAGGTCTCT | yes | IT057 | AATAGG | truseq-derived indexed<br>BarSeq primer |
| Barseq_P2_IT<br>058 | CAAGCAGAAGACGGCATAACGAGATGTTTGTGAC<br>TGGAGTTCAGACGTGTGCTCTTCCGATCTGATGTC<br>CACGAGGTCTCT   | yes | IT058 | ACAAAC | truseq-derived indexed<br>BarSeq primer |
| Barseq_P2_IT<br>059 | CAAGCAGAAGACGGCATAACGAGATAGATGTGTGAC<br>TGGAGTTCAGACGTGTGCTCTTCCGATCTGATGTC<br>CACGAGGTCTCT | yes | IT059 | ACATCT | truseq-derived indexed<br>BarSeq primer |
| Barseq_P2_IT<br>060 | CAAGCAGAAGACGGCATAACGAGATCTGGGTGTGA<br>CTGGAGTTCAGACGTGTGCTCTTCCGATCTGATGT<br>CCACGAGGTCTCT | yes | IT060 | ACCCAG | truseq-derived indexed<br>BarSeq primer |
| Barseq_P2_IT<br>061 | CAAGCAGAAGACGGCATAACGAGATGCCGGTGTGA<br>CTGGAGTTCAGACGTGTGCTCTTCCGATCTGATGT<br>CCACGAGGTCTCT | yes | IT061 | ACCGGC | truseq-derived indexed<br>BarSeq primer |
| Barseq_P2_IT<br>062 | CAAGCAGAAGACGGCATAACGAGATTATCGTGTGAC<br>TGGAGTTCAGACGTGTGCTCTTCCGATCTGATGTC<br>CACGAGGTCTCT | yes | IT062 | ACGATA | truseq-derived indexed<br>BarSeq primer |
| Barseq_P2_IT<br>063 | CAAGCAGAAGACGGCATAACGAGATGAGAGTGTGA<br>CTGGAGTTCAGACGTGTGCTCTTCCGATCTGATGT<br>CCACGAGGTCTCT | yes | IT063 | ACTCTC | truseq-derived indexed<br>BarSeq primer |
| Barseq_P2_IT<br>064 | CAAGCAGAAGACGGCATAACGAGATTCTTCTGTGAC<br>TGGAGTTCAGACGTGTGCTCTTCCGATCTGATGTC<br>CACGAGGTCTCT | yes | IT064 | AGAAGA | truseq-derived indexed<br>BarSeq primer |
| Barseq_P2_IT<br>065 | CAAGCAGAAGACGGCATAACGAGATCTATCTGTGAC<br>TGGAGTTCAGACGTGTGCTCTTCCGATCTGATGTC<br>CACGAGGTCTCT | yes | IT065 | AGATAG | truseq-derived indexed<br>BarSeq primer |
| Barseq_P2_IT<br>066 | CAAGCAGAAGACGGCATAACGAGATGATGCTGTGA<br>CTGGAGTTCAGACGTGTGCTCTTCCGATCTGATGT<br>CCACGAGGTCTCT | yes | IT066 | AGCATC | truseq-derived indexed<br>BarSeq primer |
| Barseq_P2_IT<br>067 | CAAGCAGAAGACGGCATAACGAGATAGCGCTGTGA<br>CTGGAGTTCAGACGTGTGCTCTTCCGATCTGATGT<br>CCACGAGGTCTCT | yes | IT067 | AGCGCT | truseq-derived indexed<br>BarSeq primer |
| Barseq_P2_IT<br>068 | CAAGCAGAAGACGGCATAACGAGATCGGCCTGTGA<br>CTGGAGTTCAGACGTGTGCTCTTCCGATCTGATGT<br>CCACGAGGTCTCT | yes | IT068 | AGGCCG | truseq-derived indexed<br>BarSeq primer |
| Barseq_P2_IT<br>069 | CAAGCAGAAGACGGCATAACGAGATCCGTATGTGAC<br>TGGAGTTCAGACGTGTGCTCTTCCGATCTGATGTC<br>CACGAGGTCTCT | yes | IT069 | ATACGG | truseq-derived indexed<br>BarSeq primer |
| Barseq_P2_IT<br>070 | CAAGCAGAAGACGGCATAACGAGATTAGGATGTGAC<br>TGGAGTTCAGACGTGTGCTCTTCCGATCTGATGTC<br>CACGAGGTCTCT | yes | IT070 | ATCCTA | truseq-derived indexed<br>BarSeq primer |

|                     |                                                                                             |     |       |        |                                         |
|---------------------|---------------------------------------------------------------------------------------------|-----|-------|--------|-----------------------------------------|
| Barseq_P2_IT<br>071 | CAAGCAGAAGACGGCATAACGAGATATAGATGTGAC<br>TGGAGTTCAGACGTGTGCTCTTCCGATCTGATGTC<br>CACGAGGTCTCT | yes | IT071 | ATCTAT | truseq-derived indexed<br>BarSeq primer |
| Barseq_P2_IT<br>072 | CAAGCAGAAGACGGCATAACGAGATGCGTGGGTGA<br>CTGGAGTTCAGACGTGTGCTCTTCCGATCTGATGT<br>CCACGAGGTCTCT | yes | IT072 | CCACGC | truseq-derived indexed<br>BarSeq primer |
| Barseq_P2_IT<br>073 | CAAGCAGAAGACGGCATAACGAGATCATGGGGTGA<br>CTGGAGTTCAGACGTGTGCTCTTCCGATCTGATGT<br>CCACGAGGTCTCT | yes | IT073 | CCCATG | truseq-derived indexed<br>BarSeq primer |
| Barseq_P2_IT<br>074 | CAAGCAGAAGACGGCATAACGAGATTTGCGGGTGA<br>CTGGAGTTCAGACGTGTGCTCTTCCGATCTGATGT<br>CCACGAGGTCTCT | yes | IT074 | CCGCAA | truseq-derived indexed<br>BarSeq primer |
| Barseq_P2_IT<br>075 | CAAGCAGAAGACGGCATAACGAGATCTAAGGGTGA<br>CTGGAGTTCAGACGTGTGCTCTTCCGATCTGATGT<br>CCACGAGGTCTCT | yes | IT075 | CCTTAG | truseq-derived indexed<br>BarSeq primer |
| Barseq_P2_IT<br>076 | CAAGCAGAAGACGGCATAACGAGATTTCTCGGTGAC<br>TGGAGTTCAGACGTGTGCTCTTCCGATCTGATGTC<br>CACGAGGTCTCT | yes | IT076 | CGAGAA | truseq-derived indexed<br>BarSeq primer |
| Barseq_P2_IT<br>077 | CAAGCAGAAGACGGCATAACGAGATCAGCAGGTGA<br>CTGGAGTTCAGACGTGTGCTCTTCCGATCTGATGT<br>CCACGAGGTCTCT | yes | IT077 | CTGCTG | truseq-derived indexed<br>BarSeq primer |
| Barseq_P2_IT<br>078 | CAAGCAGAAGACGGCATAACGAGATGGTTTCGTGA<br>CTGGAGTTCAGACGTGTGCTCTTCCGATCTGATGT<br>CCACGAGGTCTCT | yes | IT078 | GAAACC | truseq-derived indexed<br>BarSeq primer |
| Barseq_P2_IT<br>079 | CAAGCAGAAGACGGCATAACGAGATTTATTCGTGAC<br>TGGAGTTCAGACGTGTGCTCTTCCGATCTGATGTC<br>CACGAGGTCTCT | yes | IT079 | GAATAA | truseq-derived indexed<br>BarSeq primer |
| Barseq_P2_IT<br>080 | CAAGCAGAAGACGGCATAACGAGATTCGTCGTGA<br>CTGGAGTTCAGACGTGTGCTCTTCCGATCTGATGT<br>CCACGAGGTCTCT  | yes | IT080 | GACGGA | truseq-derived indexed<br>BarSeq primer |
| Barseq_P2_IT<br>081 | CAAGCAGAAGACGGCATAACGAGATTATATCGTGAC<br>TGGAGTTCAGACGTGTGCTCTTCCGATCTGATGTC<br>CACGAGGTCTCT | yes | IT081 | GATATA | truseq-derived indexed<br>BarSeq primer |
| Barseq_P2_IT<br>082 | CAAGCAGAAGACGGCATAACGAGATAGCATCGTGAC<br>TGGAGTTCAGACGTGTGCTCTTCCGATCTGATGTC<br>CACGAGGTCTCT | yes | IT082 | GATGCT | truseq-derived indexed<br>BarSeq primer |
| Barseq_P2_IT<br>083 | CAAGCAGAAGACGGCATAACGAGATCCTTGCGTGA<br>CTGGAGTTCAGACGTGTGCTCTTCCGATCTGATGT<br>CCACGAGGTCTCT | yes | IT083 | GCAAGG | truseq-derived indexed<br>BarSeq primer |
| Barseq_P2_IT<br>084 | CAAGCAGAAGACGGCATAACGAGATAAGTGCGTGA<br>CTGGAGTTCAGACGTGTGCTCTTCCGATCTGATGT<br>CCACGAGGTCTCT | yes | IT084 | GCACTT | truseq-derived indexed<br>BarSeq primer |
| Barseq_P2_IT<br>085 | CAAGCAGAAGACGGCATAACGAGATTAAGGCGTGA<br>CTGGAGTTCAGACGTGTGCTCTTCCGATCTGATGT<br>CCACGAGGTCTCT | yes | IT085 | GCCTTA | truseq-derived indexed<br>BarSeq primer |
| Barseq_P2_IT<br>086 | CAAGCAGAAGACGGCATAACGAGATTGGAGCGTGA<br>CTGGAGTTCAGACGTGTGCTCTTCCGATCTGATGT<br>CCACGAGGTCTCT | yes | IT086 | GCTCCA | truseq-derived indexed<br>BarSeq primer |
| Barseq_P2_IT<br>087 | CAAGCAGAAGACGGCATAACGAGATTGTGCCGTGA<br>CTGGAGTTCAGACGTGTGCTCTTCCGATCTGATGT<br>CCACGAGGTCTCT | yes | IT087 | GGCACA | truseq-derived indexed<br>BarSeq primer |
| Barseq_P2_IT<br>088 | CAAGCAGAAGACGGCATAACGAGATCAGGCCGTGA<br>CTGGAGTTCAGACGTGTGCTCTTCCGATCTGATGT<br>CCACGAGGTCTCT | yes | IT088 | GGCCTG | truseq-derived indexed<br>BarSeq primer |
| Barseq_P2_IT<br>089 | CAAGCAGAAGACGGCATAACGAGATGGTAGAGTGA<br>CTGGAGTTCAGACGTGTGCTCTTCCGATCTGATGT<br>CCACGAGGTCTCT | yes | IT089 | TCTACC | truseq-derived indexed<br>BarSeq primer |
| Barseq_P2_IT<br>090 | CAAGCAGAAGACGGCATAACGAGATCATTCAGTGAC<br>TGGAGTTCAGACGTGTGCTCTTCCGATCTGATGTC<br>CACGAGGTCTCT | yes | IT090 | TGAATG | truseq-derived indexed<br>BarSeq primer |
| Barseq_P2_IT<br>091 | CAAGCAGAAGACGGCATAACGAGATATGGCAGTGA<br>CTGGAGTTCAGACGTGTGCTCTTCCGATCTGATGT<br>CCACGAGGTCTCT | yes | IT091 | TGCCAT | truseq-derived indexed<br>BarSeq primer |



|                     |                                                                                             |     |       |        |                                         |
|---------------------|---------------------------------------------------------------------------------------------|-----|-------|--------|-----------------------------------------|
| Barseq_P2_IT<br>092 | CAAGCAGAAGACGGCATAACGAGATCCAGCAGTGA<br>CTGGAGTTCAGACGTGTGCTCTTCCGATCTGATGT<br>CCACGAGGTCTCT | yes | IT092 | TGCTGG | truseq-derived indexed<br>BarSeq primer |
| Barseq_P2_IT<br>093 | CAAGCAGAAGACGGCATAACGAGATGCGCCAGTGA<br>CTGGAGTTCAGACGTGTGCTCTTCCGATCTGATGT<br>CCACGAGGTCTCT | yes | IT093 | TGGCGC | truseq-derived indexed<br>BarSeq primer |
| Barseq_P2_IT<br>094 | CAAGCAGAAGACGGCATAACGAGATTCGAAGTGAC<br>TGGAGTTCAGACGTGTGCTCTTCCGATCTGATGTC<br>CACGAGGTCTCT  | yes | IT094 | TTCGAA | truseq-derived indexed<br>BarSeq primer |
| Barseq_P2_IT<br>095 | CAAGCAGAAGACGGCATAACGAGATGGAGAAGTGA<br>CTGGAGTTCAGACGTGTGCTCTTCCGATCTGATGT<br>CCACGAGGTCTCT | yes | IT095 | TTCTCC | truseq-derived indexed<br>BarSeq primer |
| Barseq_P2_IT<br>096 | CAAGCAGAAGACGGCATAACGAGATAAACCTGTGAC<br>TGGAGTTCAGACGTGTGCTCTTCCGATCTGATGTC<br>CACGAGGTCTCT | yes | IT096 | AGGTTT | truseq-derived indexed<br>BarSeq primer |
