# Supplementary material for: Rapid Quantification of Mutant Fitness in Diverse Bacteria by Sequencing Randomly Bar-Coded Transposons
Source: PubMed Central journal article supplement — mBio. 2015 May 12;6(3):e00306-15. doi: 10.1128/mBio.00306-15 (PMC4436071; doi:10.1128/mbio.00306-15), 2015-05-12
Supplement: mbo002152313st3.pdf [file mbo002152313st3.pdf]

**Table S3. Vectors used in this study.**

| <b>Vector</b>  | <b>Description</b>                                                                                                                         | <b>Source</b>                    |
|----------------|--------------------------------------------------------------------------------------------------------------------------------------------|----------------------------------|
| pMiniHimar_RB1 | <i>mariner</i> transposon vector                                                                                                           | Larsen et al.<br>PMID 12189420   |
| pRL27          | <i>Tn5</i> transposon vector                                                                                                               | Bouhenni et al.<br>PMID 16085900 |
| pDONR/Zeo      | Gateway adapted vector for generating <i>attL</i> flanked entry clones                                                                     | Invitrogen                       |
| pKMW1          | library of ~10 million random barcodes flanked by common PCR priming sites and SbfI and FseI sites; derived from pDONR/Zeo                 | this study                       |
| pKMW2          | <i>mariner</i> transposon vector with SbfI and FseI sites near inverted repeat; derived from pMiniHimar_RB1                                | this study                       |
| pKMW3          | <i>mariner</i> transposon vector library with ~3 million unique 20mer DNA barcodes flanked by common PCR priming sites; derived from pKMW2 | this study                       |
| pKMW4          | <i>Tn5</i> transposon vector with SbfI and FseI sites near inverted repeat; derived from pRL27                                             | this study                       |
| pKMW7          | <i>Tn5</i> transposon vector library with >10 million unique 20mer DNA barcodes flanked by common PCR priming sites; derived from pKMW4    | this study                       |
