# Supplementary figures and images for: Rapid Quantification of Mutant Fitness in Diverse Bacteria by Sequencing Randomly Bar-Coded Transposons
Source: PubMed Central journal article supplement — mBio. 2015 May 12;6(3):e00306-15. doi: 10.1128/mBio.00306-15 (PMC4436071; doi:10.1128/mbio.00306-15), 2015-05-12

# Figure S2

## A

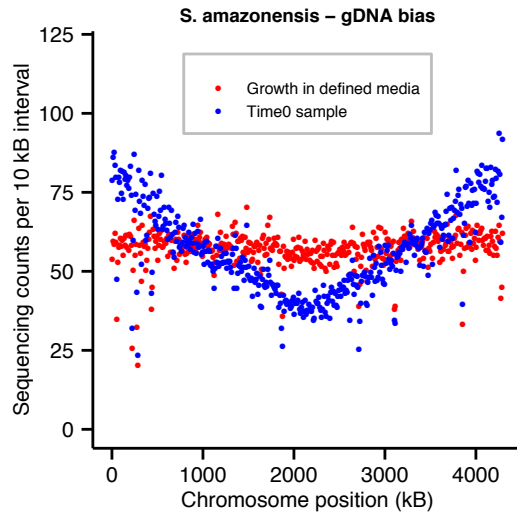

## B

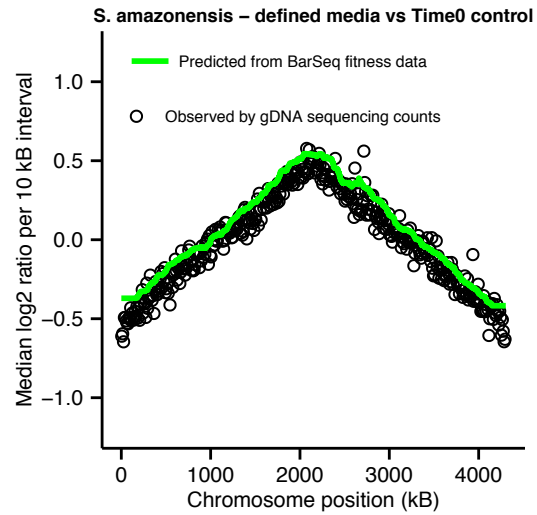

## C

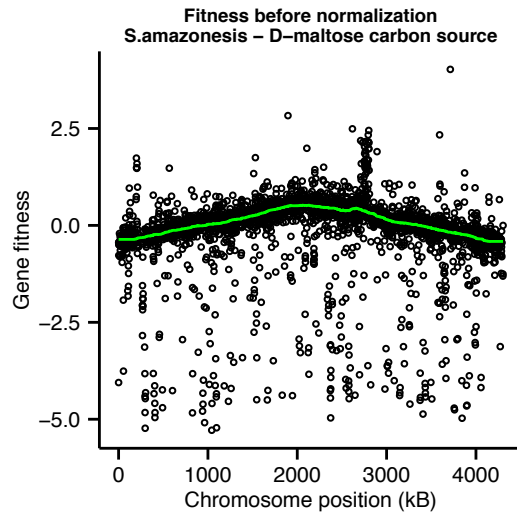

## D

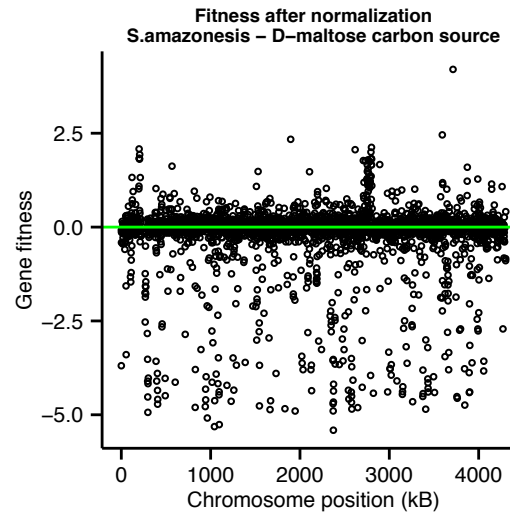

Supplement: mbo002152313sf2.pdf [file mbo002152313sf2.pdf]

Figure S3

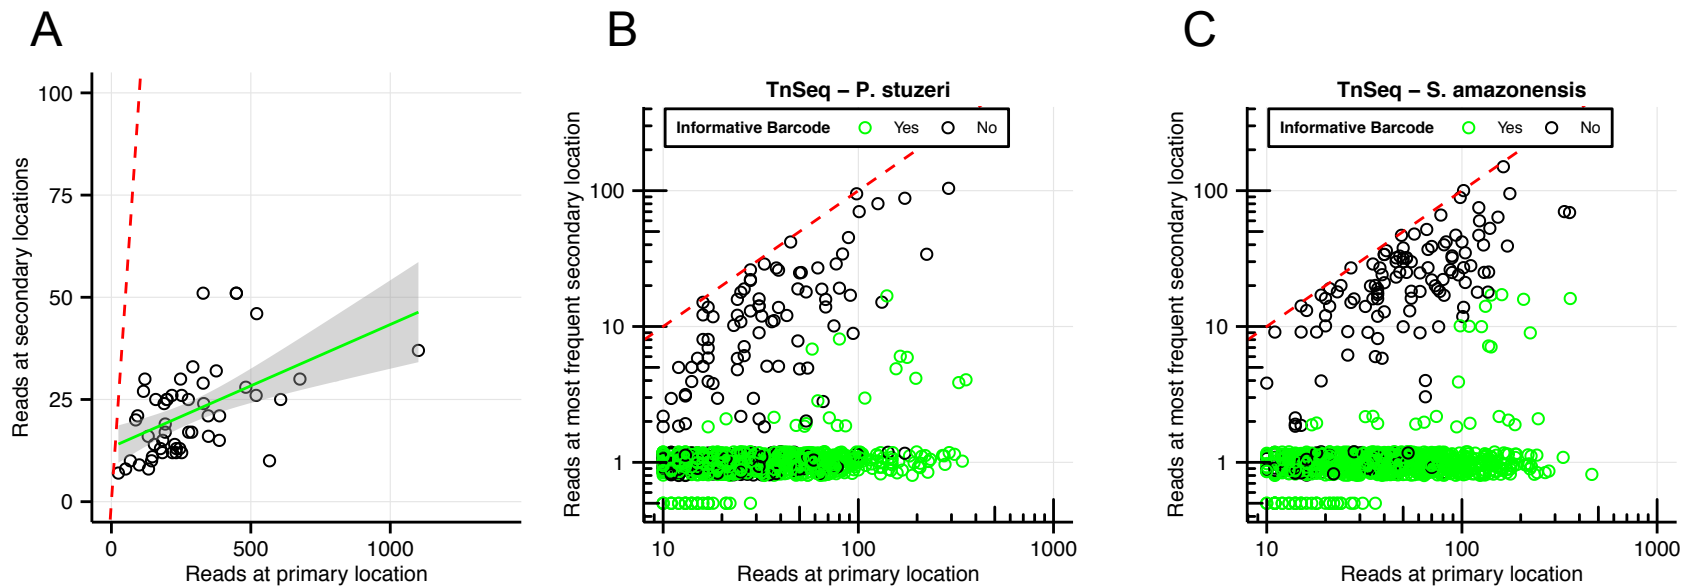

Supplement: mbo002152313sf3.pdf [file mbo002152313sf3.pdf]
